# Supplementary material for: Preserving Pure Siamese Crocodile Populations: A Comprehensive Approach Using Multi-Genetic Tools
Source: MDPI journal article supplement (doi:10.3390/biology12111428), 2023-11-13
Supplement: s1 [file s1]

**Table S1.** Detailed information on the sampled individuals.

| No. | Abbreviation/Code | Species                     | Captive/Wild population | Locality | Reference                |
|-----|-------------------|-----------------------------|-------------------------|----------|--------------------------|
| 1   | CSI01             | <i>Crocodylus siamensis</i> | Captivity # 1           | Thailand | Lapbenjakul et al., 2017 |
| 2   | CSI02             | <i>Crocodylus siamensis</i> | Captivity # 1           | Thailand | Lapbenjakul et al., 2017 |
| 3   | CSI03             | <i>Crocodylus siamensis</i> | Captivity # 1           | Thailand | Lapbenjakul et al., 2017 |
| 4   | CSI04             | <i>Crocodylus siamensis</i> | Captivity # 1           | Thailand | Lapbenjakul et al., 2017 |
| 5   | CSI05             | <i>Crocodylus siamensis</i> | Captivity # 1           | Thailand | Lapbenjakul et al., 2017 |
| 6   | CSI06             | <i>Crocodylus siamensis</i> | Captivity # 1           | Thailand | Lapbenjakul et al., 2017 |
| 7   | CSI07             | <i>Crocodylus siamensis</i> | Captivity # 2           | Thailand | Lapbenjakul et al., 2017 |
| 8   | CSI09             | <i>Crocodylus siamensis</i> | Captivity # 2           | Thailand | Lapbenjakul et al., 2017 |
| 9   | CSI10             | <i>Crocodylus siamensis</i> | Captivity # 3           | Thailand | Lapbenjakul et al., 2017 |
| 10  | CSI11             | <i>Crocodylus siamensis</i> | Captivity # 3           | Thailand | Lapbenjakul et al., 2017 |
| 11  | CSI12             | <i>Crocodylus siamensis</i> | Captivity # 3           | Thailand | Lapbenjakul et al., 2017 |
| 12  | CSI13             | <i>Crocodylus siamensis</i> | Captivity # 3           | Thailand | Lapbenjakul et al., 2017 |
| 13  | CSI14             | <i>Crocodylus siamensis</i> | Captivity # 4           | Thailand | Lapbenjakul et al., 2017 |
| 14  | CSI15             | <i>Crocodylus siamensis</i> | Captivity # 4           | Thailand | Lapbenjakul et al., 2017 |
| 15  | CSI20             | <i>Crocodylus siamensis</i> | Captivity # 5           | Thailand | Lapbenjakul et al., 2017 |
| 16  | CSI21             | <i>Crocodylus siamensis</i> | Captivity # 5           | Thailand | Lapbenjakul et al., 2017 |
| 17  | CSI22             | <i>Crocodylus siamensis</i> | Captivity # 6           | Thailand | Lapbenjakul et al., 2017 |
| 18  | CSI23             | <i>Crocodylus siamensis</i> | Captivity # 6           | Thailand | Lapbenjakul et al., 2017 |
| 19  | CSI24             | <i>Crocodylus siamensis</i> | Captivity # 6           | Thailand | Lapbenjakul et al., 2017 |
| 20  | CSI25             | <i>Crocodylus siamensis</i> | Captivity # 6           | Thailand | Lapbenjakul et al., 2017 |
| 21  | CSI27             | <i>Crocodylus siamensis</i> | Captivity # 7           | Thailand | Lapbenjakul et al., 2017 |
| 22  | CSI28             | <i>Crocodylus siamensis</i> | Captivity # 7           | Thailand | Lapbenjakul et al., 2017 |
| 23  | CSI29             | <i>Crocodylus siamensis</i> | Captivity # 8           | Thailand | Lapbenjakul et al., 2017 |
| 24  | CSI30             | <i>Crocodylus siamensis</i> | Captivity # 8           | Thailand | Lapbenjakul et al., 2017 |
| 25  | CSI34             | <i>Crocodylus siamensis</i> | Captivity # 9           | Thailand | Lapbenjakul et al., 2017 |
| 26  | CSI35             | <i>Crocodylus siamensis</i> | Captivity # 9           | Thailand | Lapbenjakul et al., 2017 |
| 27  | CSI36             | <i>Crocodylus siamensis</i> | Captivity # 9           | Thailand | Lapbenjakul et al., 2017 |
| 28  | CSI37             | <i>Crocodylus siamensis</i> | Captivity # 10          | Thailand | Lapbenjakul et al., 2017 |
| 29  | CSI38             | <i>Crocodylus siamensis</i> | Captivity # 10          | Thailand | Lapbenjakul et al., 2017 |
| 30  | CPOTH01           | <i>Crocodylus porosus</i>   | Captivity # 2           | Thailand | Lapbenjakul et al., 2017 |

| No. | Abbreviation/Code | Species                     | Captive/Wild population | Locality  | Reference                |
|-----|-------------------|-----------------------------|-------------------------|-----------|--------------------------|
| 31  | CPOTH02           | <i>Crocodylus porosus</i>   | Captivity # 2           | Thailand  | Lapbenjakul et al., 2017 |
| 32  | CPOTH03           | <i>Crocodylus porosus</i>   | Captivity # 2           | Thailand  | Lapbenjakul et al., 2017 |
| 33  | CPOTH04           | <i>Crocodylus porosus</i>   | Captivity # 2           | Thailand  | Lapbenjakul et al., 2017 |
| 34  | CPOTH05           | <i>Crocodylus porosus</i>   | Captivity # 3           | Thailand  | Lapbenjakul et al., 2017 |
| 35  | CPOTH08           | <i>Crocodylus porosus</i>   | Captivity # 3           | Thailand  | Lapbenjakul et al., 2017 |
| 36  | CPOTH09           | <i>Crocodylus porosus</i>   | Captivity # 5           | Thailand  | Lapbenjakul et al., 2017 |
| 37  | CPOTH11           | <i>Crocodylus porosus</i>   | Captivity # 6           | Thailand  | Lapbenjakul et al., 2017 |
| 38  | CPOTH12           | <i>Crocodylus porosus</i>   | Captivity # 6           | Thailand  | Lapbenjakul et al., 2017 |
| 39  | CPOTH15           | <i>Crocodylus porosus</i>   | Captivity # 9           | Thailand  | Lapbenjakul et al., 2017 |
| 40  | CPOTH16           | <i>Crocodylus porosus</i>   | Captivity # 9           | Thailand  | Lapbenjakul et al., 2017 |
| 41  | CPOTH17           | <i>Crocodylus porosus</i>   | Captivity # 9           | Thailand  | Lapbenjakul et al., 2017 |
| 42  | CPOAU0384         | <i>Crocodylus porosus</i>   | Wild                    | Australia | Fukuda et al., 2022      |
| 43  | CPOAU0493         | <i>Crocodylus porosus</i>   | Wild                    | Australia | Fukuda et al., 2022      |
| 44  | CPOAU0392         | <i>Crocodylus porosus</i>   | Wild                    | Australia | Fukuda et al., 2022      |
| 45  | CPOAU0494         | <i>Crocodylus porosus</i>   | Wild                    | Australia | Fukuda et al., 2022      |
| 46  | CPOAU0495         | <i>Crocodylus porosus</i>   | Wild                    | Australia | Fukuda et al., 2022      |
| 47  | CPOAU0497         | <i>Crocodylus porosus</i>   | Wild                    | Australia | Fukuda et al., 2022      |
| 48  | CPOAU0753         | <i>Crocodylus porosus</i>   | Wild                    | Australia | Fukuda et al., 2022      |
| 49  | CPOAU0698         | <i>Crocodylus porosus</i>   | Wild                    | Australia | Fukuda et al., 2022      |
| 50  | CPOAU0675         | <i>Crocodylus porosus</i>   | Wild                    | Australia | Fukuda et al., 2022      |
| 51  | CPOAU0683         | <i>Crocodylus porosus</i>   | Wild                    | Australia | Fukuda et al., 2022      |
| 52  | CPOAU0712         | <i>Crocodylus porosus</i>   | Wild                    | Australia | Fukuda et al., 2022      |
| 53  | CPOAU0641         | <i>Crocodylus porosus</i>   | Wild                    | Australia | Fukuda et al., 2022      |
| 54  | CPOAU0737         | <i>Crocodylus porosus</i>   | Wild                    | Australia | Fukuda et al., 2022      |
| 55  | CPOAU0746         | <i>Crocodylus porosus</i>   | Wild                    | Australia | Fukuda et al., 2022      |
| 56  | CPOAU0661         | <i>Crocodylus porosus</i>   | Wild                    | Australia | Fukuda et al., 2022      |
| 57  | CPOAU0693         | <i>Crocodylus porosus</i>   | Wild                    | Australia | Fukuda et al., 2022      |
| 58  | CPOAU0695         | <i>Crocodylus porosus</i>   | Wild                    | Australia | Fukuda et al., 2022      |
| 59  | CPOAU0722         | <i>Crocodylus porosus</i>   | Wild                    | Australia | Fukuda et al., 2022      |
| 60  | CB01              | <i>Crocodylus siamensis</i> | –                       | Thailand  | Ariyaphong et al., 2023  |
| 61  | CB02              | <i>Crocodylus siamensis</i> | –                       | Thailand  | Ariyaphong et al., 2023  |
| 62  | CB03              | <i>Crocodylus siamensis</i> | –                       | Thailand  | Ariyaphong et al., 2023  |
| 63  | CB04              | <i>Crocodylus siamensis</i> | –                       | Thailand  | Ariyaphong et al., 2023  |

| No. | Abbreviation/Code | Species                     | Captive/Wild population | Locality | Reference                 |
|-----|-------------------|-----------------------------|-------------------------|----------|---------------------------|
| 64  | CB05              | <i>Crocodylus siamensis</i> | –                       | Thailand | Ariyaraphong et al., 2023 |
| 65  | CB11              | <i>Crocodylus siamensis</i> | –                       | Thailand | Ariyaraphong et al., 2023 |
| 66  | CB27              | <i>Crocodylus siamensis</i> | –                       | Thailand | Ariyaraphong et al., 2023 |
| 67  | CP01              | <i>Crocodylus porosus</i>   | –                       | Thailand | Ariyaraphong et al., 2023 |
| 68  | CP02              | <i>Crocodylus porosus</i>   | –                       | Thailand | Ariyaraphong et al., 2023 |
| 69  | CP03              | <i>Crocodylus porosus</i>   | –                       | Thailand | Ariyaraphong et al., 2023 |
| 70  | CP04              | <i>Crocodylus porosus</i>   | –                       | Thailand | Ariyaraphong et al., 2023 |
| 71  | CP05              | <i>Crocodylus porosus</i>   | –                       | Thailand | Ariyaraphong et al., 2023 |
| 72  | CP06              | <i>Crocodylus porosus</i>   | –                       | Thailand | Ariyaraphong et al., 2023 |
| 73  | CP11              | <i>Crocodylus porosus</i>   | –                       | Thailand | Ariyaraphong et al., 2023 |
| 74  | CP14              | <i>Crocodylus porosus</i>   | –                       | Thailand | Ariyaraphong et al., 2023 |
| 75  | CP16              | <i>Crocodylus porosus</i>   | –                       | Thailand | Ariyaraphong et al., 2023 |
| 76  | CP17              | <i>Crocodylus porosus</i>   | –                       | Thailand | Ariyaraphong et al., 2023 |

**Table S2.** DArT analysis of 59 sampled individuals at sequencing depths of >5X, >10X, and 15X.#

|                              |                                                                         | Species-diagnostic loci             |                                    |
|------------------------------|-------------------------------------------------------------------------|-------------------------------------|------------------------------------|
| Sequencing depths<br>of >5x  |                                                                         | SNP                                 | PA                                 |
|                              | Total number of DArT analyses                                           | 53,160                              | 28,775                             |
|                              | Species-diagnostic loci                                                 | 5,091                               | 4,248                              |
|                              | Overall mean distance between Siamese crocodile and saltwater crocodile | 1.00±0.000                          | 1.00±0.000                         |
|                              | Overall mean distance within Siamese crocodile                          | 0.520 ± 0.043                       | 0.388 ± 0.029                      |
|                              | Overall mean distance within saltwater crocodile                        | 0.710 ± 0.020                       | 0.667 ± 0.026                      |
|                              | CATT test                                                               | $\chi^2 = 56.00-118.00$ $p < 0.001$ | $\chi^2 = 56.00-59.00$ $p < 0.001$ |
| Sequencing depths<br>of >10x | Total number of DArT analyses                                           | 53,160                              | 28,775                             |
|                              | Species-diagnostic loci                                                 | 1,247                               | 324                                |
|                              | Overall mean distance between Siamese crocodile and saltwater crocodile | 1.00±0.00                           | 1.00±0.000                         |
|                              | Overall mean distance within Siamese crocodile                          | 0.510 ± 0.033                       | 0.300 ± 0.029                      |
|                              | Overall mean distance within saltwater crocodile                        | 0.690 ± 0.020                       | 0.657 ± 0.026                      |
|                              | CATT test                                                               | $\chi^2 = 56.00-117.00$ $p < 0.001$ | $\chi^2 = 56.00-58.00$ $p < 0.001$ |
| Sequencing depths<br>of >15x | Total number of DArT analyses                                           | 53,160                              | 28,775                             |
|                              | Species-diagnostic loci                                                 | 193                                 | 16                                 |
|                              | Overall mean distance between Siamese crocodile and saltwater crocodile | 1.00±0.00                           | 1.00±0.00                          |
|                              | Overall mean distance within Siamese crocodile                          | 0.500 ± 0.033                       | 0.300 ± 0.028                      |
|                              | Overall mean distance within saltwater crocodile                        | 0.68 ± 0.020                        | 0.655 ± 0.026                      |
|                              | CATT test                                                               | $\chi^2 = 56.00-115.00$ $p < 0.001$ | $\chi^2 = 55.00$ $p < 0.001$       |

**Table S3.** Pairwise  $F_{ST}$  values of Siamese crocodiles (*Crocodylus siamensis*) and saltwater crocodiles (*Crocodylus porosus*) at sequencing depths of >5X, >10X, and 15X.

| Sequencing<br>depths | Population         | Population         | $F_{ST}$ | $p$ -value |
|----------------------|--------------------|--------------------|----------|------------|
| > 5x                 | CPOAU <sup>1</sup> | CPOTH <sup>2</sup> | 0.219    | <0.05      |
|                      | CPOAU              | CSI <sup>3</sup>   | 1.000    | <0.05      |
|                      | CPOTH              | CSI                | 0.842    | <0.05      |
| > 10x                | CPOAU <sup>1</sup> | CPOTH <sup>2</sup> | 0.211    | <0.05      |
|                      | CPOAU              | CSI <sup>3</sup>   | 1.000    | <0.05      |
|                      | CPOTH              | CSI                | 0.942    | <0.05      |
| > 15x                | CPOAU <sup>1</sup> | CPOTH <sup>2</sup> | 0.209    | <0.05      |
|                      | CPOAU              | CSI <sup>3</sup>   | 1.000    | <0.05      |
|                      | CPOTH              | CSI                | 0.954    | <0.05      |

Note: <sup>1</sup>saltwater crocodile (*Crocodylus porosus*) from Australia, <sup>2</sup>saltwater crocodile (*Crocodylus porosus*) from Thailand, <sup>3</sup>Siamese crocodile (*Crocodylus siamensis*).

**Table S4.** Genetic diversity among 59 Siamese crocodiles (*Crocodylus siamensis*) and saltwater crocodiles (*Crocodylus porosus*) at sequencing depths of >10X and 15X.

| Sequencing depths | Population         |      | N  | N <sub>a</sub> | N <sub>e</sub> | I     | H <sub>o</sub> | H <sub>e</sub> | PIC   | F     |
|-------------------|--------------------|------|----|----------------|----------------|-------|----------------|----------------|-------|-------|
| > 10x             | CSI <sup>1</sup>   | Mean | 29 | 1.511          | 1.095          | 0.145 | 0.005          | 0.079          | 0.058 | 0.931 |
|                   |                    | S.E. | 0  | 0.007          | 0.001          | 0.002 | 0              | 0.001          | 0.09  | 0.004 |
|                   | CPOTH <sup>2</sup> | Mean | 12 | 1.511          | 1.194          | 0.216 | 0.02           | 0.133          | 0     | 0.907 |
|                   |                    | S.E. | 0  | 0.007          | 0.003          | 0.003 | 0.002          | 0.002          | 0     | 0.005 |
|                   | CPOAU <sup>3</sup> | Mean | 18 | 0.89           | 0.891          | 0     | 0              | 0              | 0     | 0     |
|                   |                    | S.E. | 0  | 0.004          | 0.004          | 0     | 0              | 0              | 0     | 0     |
|                   | All Population     | Mean | 59 | 1.304          | 1.051          | 0.120 | 0.002          | 0.046          | 0.044 | 0.934 |
|                   |                    | S.E. | 0  | 0.021          | 0.001          | 0.001 | 0              | 0.001          | 0.046 | 0.004 |
| > 15x             | CSI <sup>1</sup>   | Mean | 29 | 1.511          | 1.095          | 0.145 | 0.005          | 0.079          | 0.058 | 0.931 |
|                   |                    | S.E. | 0  | 0.007          | 0.001          | 0.002 | 0              | 0.001          | 0.09  | 0.004 |
|                   | CPOTH <sup>2</sup> | Mean | 12 | 1.511          | 1.193          | 0.216 | 0.02           | 0.133          | 0     | 0.907 |
|                   |                    | S.E. | 0  | 0.007          | 0.003          | 0.003 | 0.002          | 0.002          | 0     | 0.005 |
|                   | CPOAU <sup>3</sup> | Mean | 18 | 0.890          | 0.891          | 0     | 0              | 0              | 0     | 0     |
|                   |                    | S.E. | 0  | 0.004          | 0.004          | 0     | 0              | 0              | 0     | 0     |
|                   | All Population     | Mean | 59 | 1.304          | 1.060          | 0.120 | 0.002          | 0.046          | 0.044 | 0.934 |
|                   |                    | S.E. | 0  | 0.021          | 0.001          | 0.001 | 0              | 0.001          | 0.046 | 0.004 |

Note: <sup>1</sup>saltwater crocodile (*Crocodylus porosus*) from Australia, <sup>2</sup>saltwater crocodile (*Crocodylus porosus*) from Thailand, <sup>3</sup>Siamese crocodile (*Crocodylus siamensis*).

**Table S5.** Welch's *t*-test heterozygosity ( $H_o$ ) and heterozygosity ( $H_e$ ) of Siamese crocodiles (*Crocodylus siamensis*) and saltwater crocodiles (*Crocodylus porosus*) at sequencing depths of >10X and 15X.

| Sequencing depths | Population         | $H_o$       | $H_e$       | df     | t-test | p-value |
|-------------------|--------------------|-------------|-------------|--------|--------|---------|
| > 10x             | CSI <sup>1</sup>   | 0.005±0.000 | 0.079±0.001 | -0.074 | -74    | <0.05   |
|                   | CPOTH <sup>2</sup> | 0.020±0.002 | 0.133±0.002 | -0.113 | -39.95 | <0.05   |
|                   | CPOAU <sup>3</sup> | 0.000±0.000 | 0.000±0.000 | N/A    | N/A    | N/A     |
| > 15x             | CSI <sup>1</sup>   | 0.005±0.000 | 0.079±0.001 | -0.071 | -72    | <0.05   |
|                   | CPOTH <sup>2</sup> | 0.020±0.002 | 0.133±0.002 | -0.112 | -39.94 | <0.05   |
|                   | CPOAU <sup>3</sup> | 0.000±0.000 | 0.000±0.000 | N/A    | N/A    | N/A     |

Note: <sup>1</sup>saltwater crocodile (*Crocodylus porosus*) from Australia, <sup>2</sup>saltwater crocodile (*Crocodylus porosus*) from Thailand, <sup>3</sup>Siamese crocodile (*Crocodylus siamensis*).

**Table S6.** Comparison of genetic diversity parameters between Siamese crocodile (*Crocodylus siamensis*) and saltwater crocodile (*Crocodylus porosus*) individuals at sequencing depths of >10X and 15X.

| Sequencing depths |                   | Population 1       | Population 2       | df     | SE    | t-test  | p-value |
|-------------------|-------------------|--------------------|--------------------|--------|-------|---------|---------|
| > 10x             | Observed          | CSI <sup>1</sup>   | CPOTH <sup>2</sup> | 0.015  | 0.002 | -7.5    | <0.05   |
|                   | heterozygosity    | CSI <sup>1</sup>   | CPOAU <sup>3</sup> | 0.005  | 0     | N/A     | N/A     |
|                   | (H <sub>o</sub> ) | CPOTH <sup>2</sup> | CPOAU <sup>3</sup> | 0.02   | 0.002 | 10      | <0.05   |
|                   | Expected          | CSI <sup>1</sup>   | CPOTH <sup>2</sup> | -0.054 | 0.001 | -24.149 | <0.05   |
|                   | heterozygosity    | CSI <sup>1</sup>   | CPOAU <sup>3</sup> | N/A    | N/A   | N/A     | N/A     |
|                   | (H <sub>e</sub> ) | CPOTH <sup>2</sup> | CPOAU <sup>3</sup> | N/A    | N/A   | N/A     | N/A     |
| > 15x             | Observed          | CSI <sup>1</sup>   | CPOTH <sup>2</sup> | 0.015  | 0.002 | -7.5    | <0.05   |
|                   | heterozygosity    | CSI <sup>1</sup>   | CPOAU <sup>3</sup> | 0.005  | 0     | N/A     | N/A     |
|                   | (H <sub>o</sub> ) | CPOTH <sup>2</sup> | CPOAU <sup>3</sup> | 0.02   | 0.002 | 10      | <0.05   |
|                   | Expected          | CSI <sup>1</sup>   | CPOTH <sup>2</sup> | -0.054 | 0.001 | -24.149 | <0.05   |
|                   | heterozygosity    | CSI <sup>1</sup>   | CPOAU <sup>3</sup> | N/A    | N/A   | N/A     | N/A     |
|                   | (H <sub>e</sub> ) | CPOTH <sup>2</sup> | CPOAU <sup>3</sup> | N/A    | N/A   | N/A     | N/A     |

Note: <sup>1</sup>saltwater crocodile (*Crocodylus porosus*) from Australia, <sup>2</sup>saltwater crocodile (*Crocodylus porosus*) from Thailand,

<sup>3</sup>Siamese crocodile (*Crocodylus siamensis*).



**Table S7.** Proportion of conserved SNP<sub>1</sub> loci in Siamese and saltwater crocodile populations at sequencing depths of >5X, >10X, and 15X.

| Sequencing depths | Siamese and saltwater crocodiles | Within the Siamese crocodile population | Within saltwater crocodiles |
|-------------------|----------------------------------|-----------------------------------------|-----------------------------|
| > 5x              | 25.80%                           | 79.80%                                  | 78.30%                      |
| > 10x             | 43.60%                           | 100.00%                                 | 99.99%                      |
| > 15x             | 44.70%                           | 100.00%                                 | 100.00%                     |

**Table S8.** Genetic diversity among Siamese crocodiles (*Crocodylus siamensis*) and saltwater crocodiles (*Crocodylus porosus*).

| Population         |      | SNP data              |                       |            | Microsatellite data <sup>1</sup> |                       |            |
|--------------------|------|-----------------------|-----------------------|------------|----------------------------------|-----------------------|------------|
|                    |      | <i>H</i> <sub>o</sub> | <i>H</i> <sub>e</sub> | <i>PIC</i> | <i>H</i> <sub>o</sub>            | <i>H</i> <sub>e</sub> | <i>PIC</i> |
| CSP <sup>2</sup>   | Mean | 0.005                 | 0.079                 | 0.058      | 0.483                            | 0.583                 | 0.556      |
|                    | S.E. | 0.000                 | 0.001                 | 0.090      | 0.067                            | 0.068                 | 0.321      |
| CPOTH <sup>3</sup> | Mean | 0.020                 | 0.133                 | 0.000      | 0.598                            | 0.671                 | 0.637      |
|                    | S.E. | 0.002                 | 0.002                 | 0.000      | 0.058                            | 0.044                 | 0.212      |
| CPOAU <sup>4</sup> | Mean | 0.000                 | 0.000                 | 0.000      | -                                | -                     | -          |
|                    | S.E. | 0.000                 | 0.000                 | 0.000      | -                                | -                     | -          |
| All Population     | Mean | 0.002                 | 0.046                 | 0.044      | 0.541                            | 0.627                 | 0.697      |
|                    | S.E. | 0.000                 | 0.001                 | 0.046      | 0.045                            | 0.041                 | 0.201      |

Note: <sup>1</sup>Data were from retrieved Lapbenjakul et al. (2017), <sup>2</sup>Siamese crocodile (*Crocodylus siamensis*), <sup>3</sup>saltwater crocodile (*Crocodylus porosus*) from Thailand, <sup>4</sup>saltwater crocodile (*Crocodylus porosus*) from Australia (Fukuda et al., 2022)<sup>1</sup>

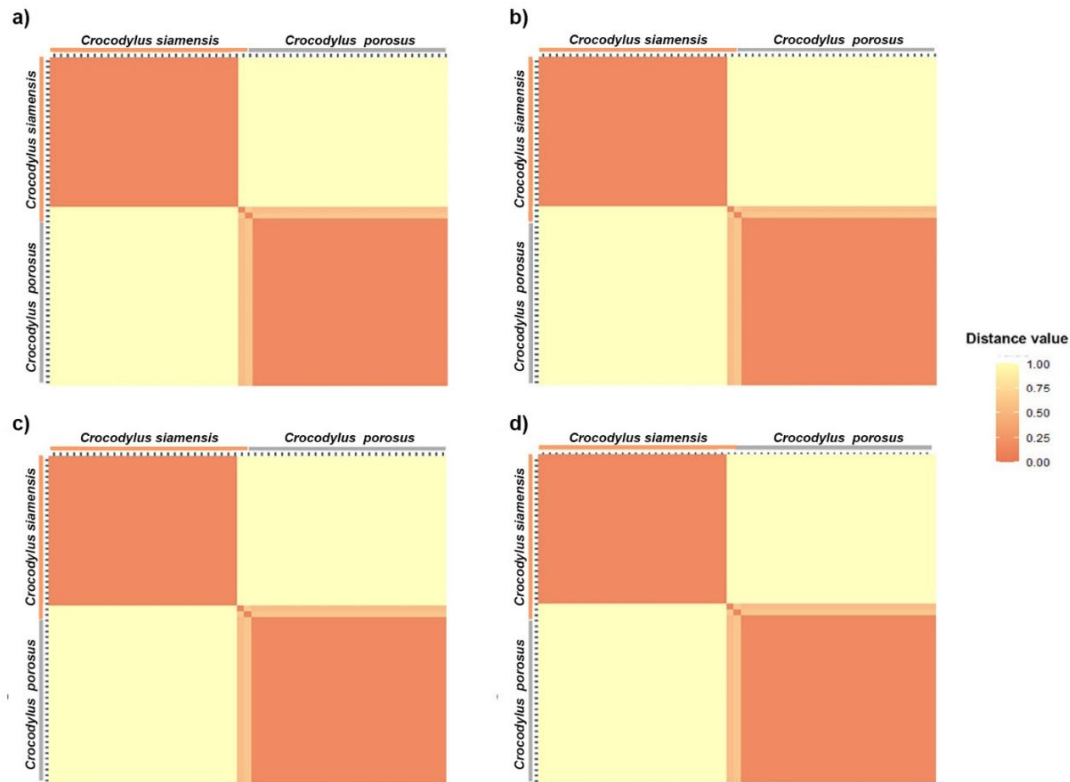

**Figure S1.** Hamming distance between the Siamese crocodile (*Crocodylus siamensis*, CSI) and saltwater crocodile (*Crocodylus porosus*, CPO) at sequencing depths of >10X. (a) SNP loci with the criterion of species-diagnostic loci (CSI: CPO), and (b) PA loci with the criterion of species-diagnostic loci (CSI: CPO). Sequencing depths of >15X. (c) SNP loci with the criterion of species-diagnostic loci (CSI: CPO), and (d) PA loci with the criterion of species-diagnostic loci (CSI: CPO)

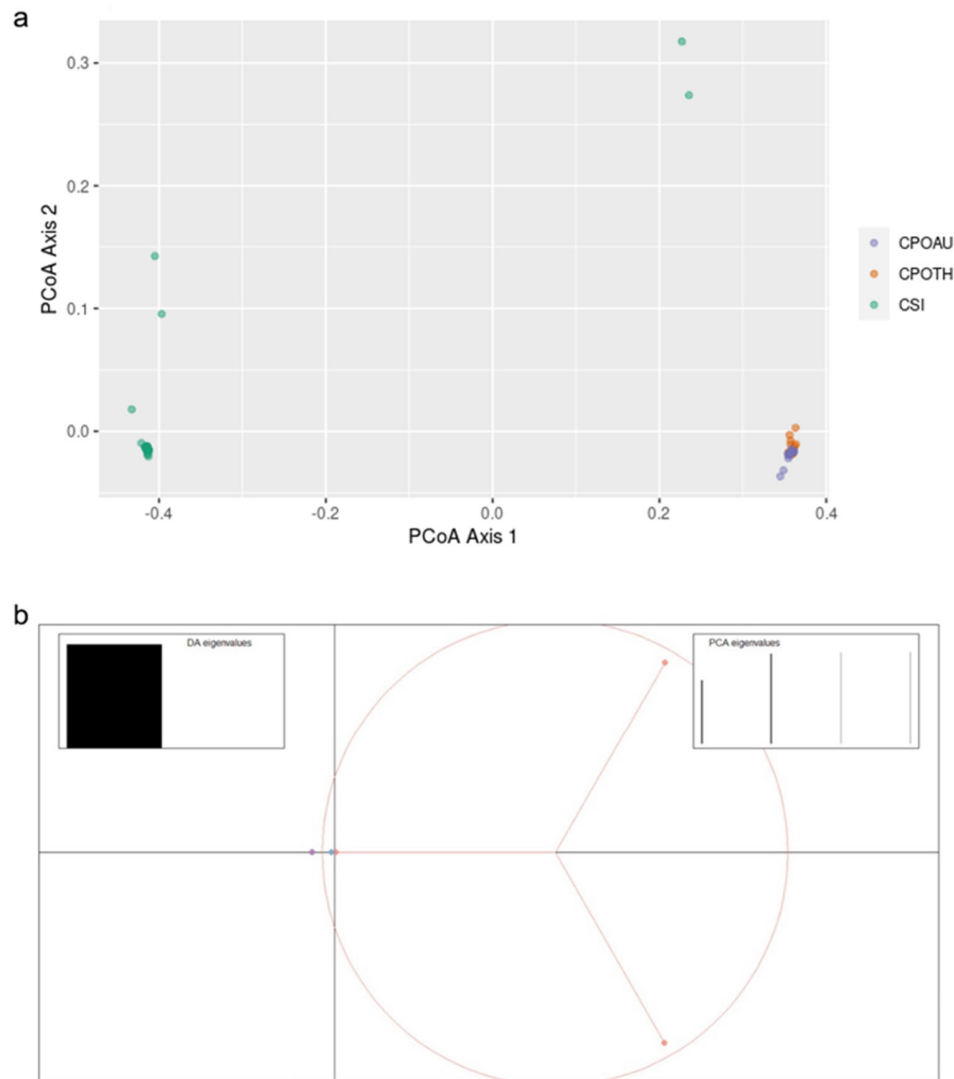

**Figure S2.** (a) Principal coordinate analysis (PCoA) of filtered data of genome-wide single-nucleotide polymorphisms (SNP) among Siamese–saltwater crocodiles, Siamese (CSI)–saltwater (CPOTH) crocodiles (Thai population), and saltwater (CPOAU) crocodiles (Australian population). (b) Discriminant analysis of principal components (DAPC) of among Siamese–saltwater crocodiles, Siamese (CSI)–saltwater (CPOTH) crocodiles (Thai population), and saltwater (CPOAU) crocodiles (Australian population).

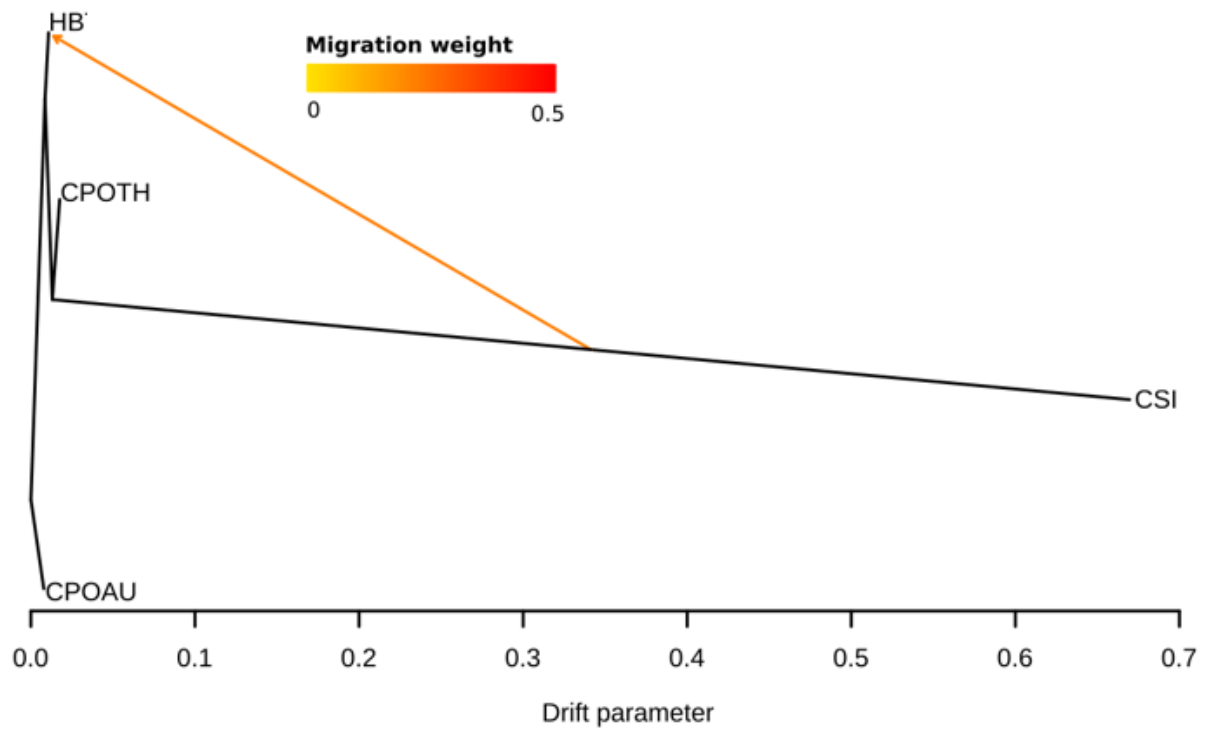

**Figure S3.** TreeMix analysis showing the gene flow from population Siamese crocodile (CSI) towards Hybrid crocodile (HB) with genetic drift.

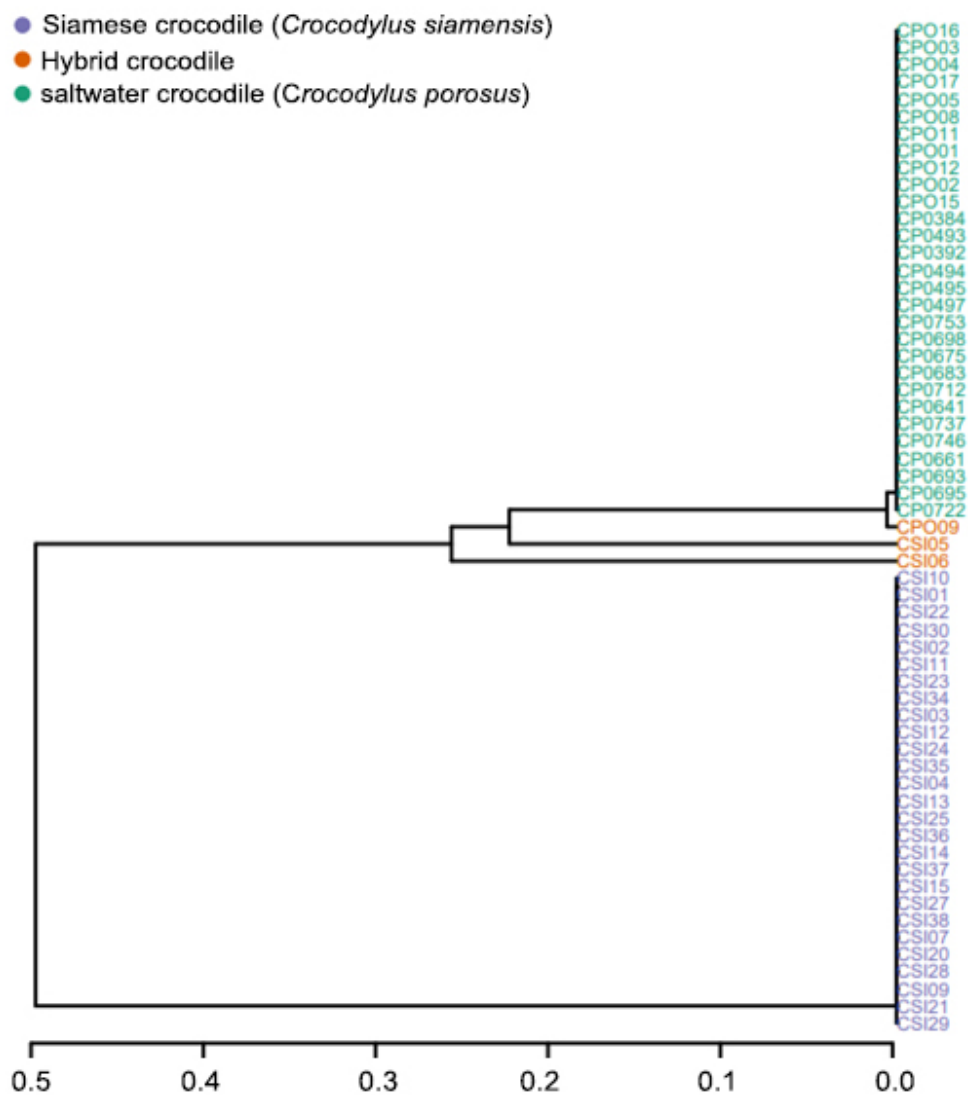

**Figure S4.** Unweighted pair group method with arithmetic mean (UPGMA) phylogeny relationship among Siamese crocodile (*Crocodylus siamensis*), saltwater crocodile (*Crocodylus porosus*), and hybrid crocodile.

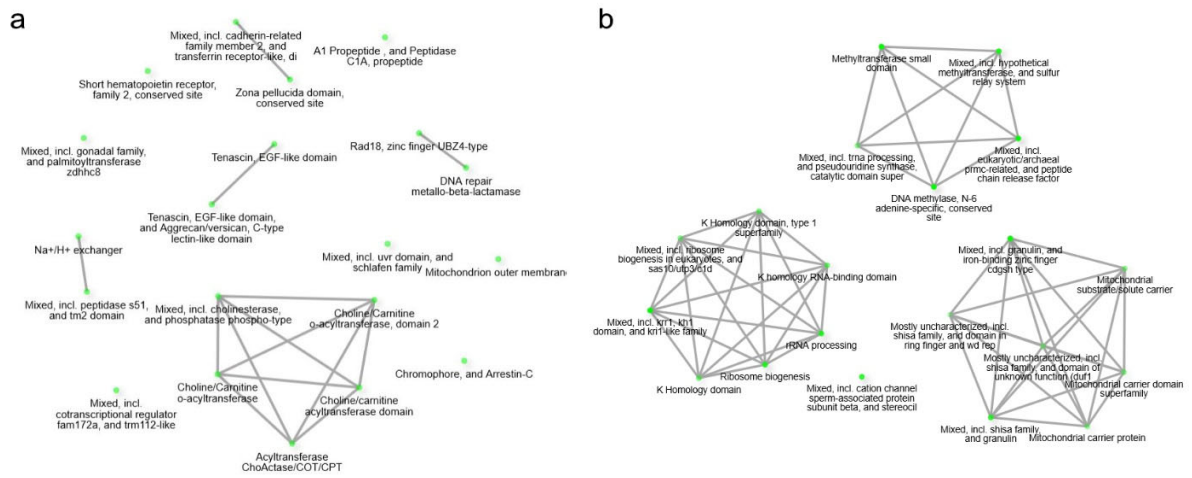

**Figure S5.** Homology of putative species-specific loci in Siamese crocodile (*Crocodylus siamensis*) and saltwater crocodile (*Crocodylus porosus*).

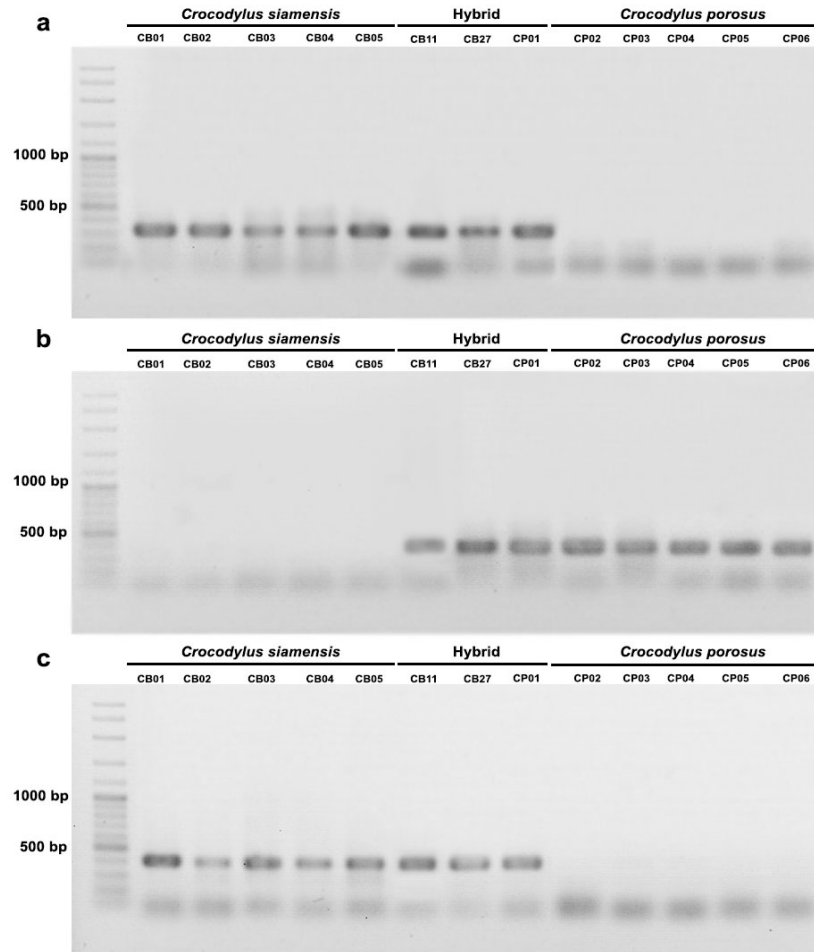

**Figure S6.** PCR validation species-diagnostic loci among Siamese crocodile (*Crocodylus siamensis*), saltwater crocodile (*Crocodylus porosus*), and hybrid crocodile. (a) Primer CST09 (locus id: 23111606), (b) primer CST01 (locus id: 23113297), and (d) primer CPT08 (locus id: 34606790). Detailed information on the sampled individuals in Supplementary Table S1
